# Supplementary material for: Genome-Wide Association Study Link Novel Loci to Endometriosis
Source: PLOS journal article supplement (doi:10.1371/journal.pone.0058257), 2013-03-05
Supplement: S1 (10.1371/journal.pone.0058257.s001) [file journal.pone.0058257.s001]

Panel A

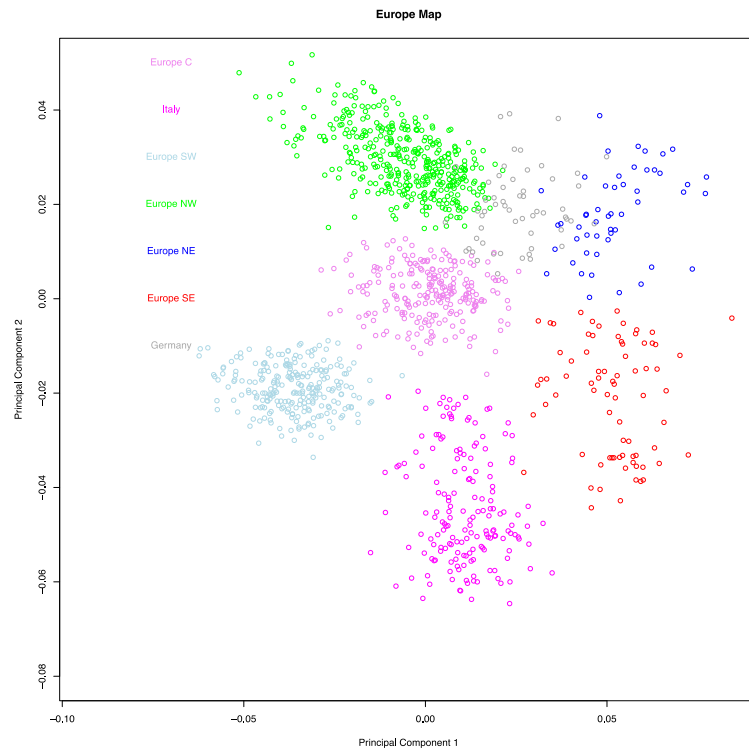

Panel B

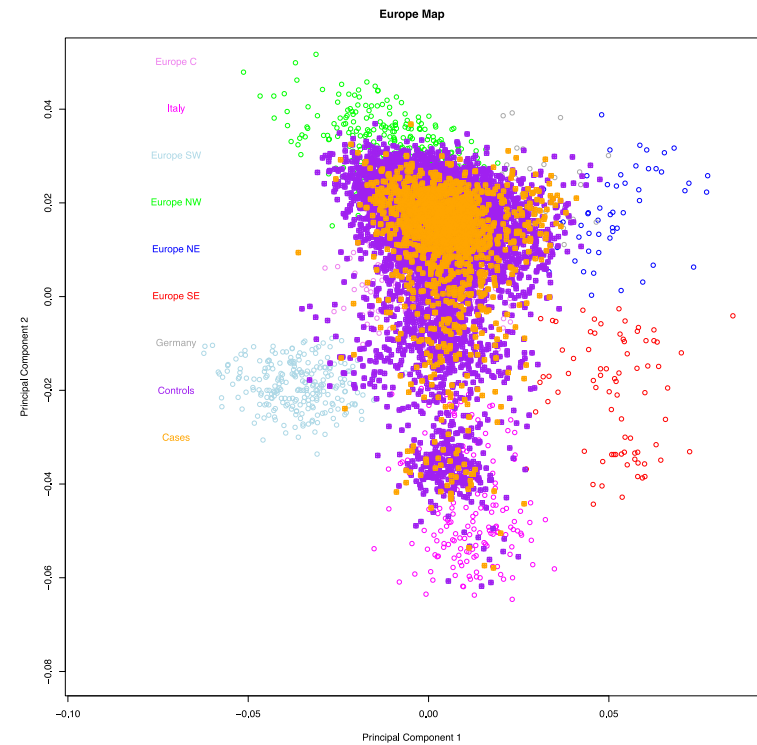

**Figure S1 PCA plot of samples with greater than 95% Caucasian ancestry component mapped against samples of known European origin.** Panel A show a set of POPRES samples of known geographic origin within Europe (Nelson et al. 2008). Panel B show the Case samples (orange dots) and Control samples (purple dots) from the present study mapped into the same space identified in Panel A. The preponderance of both Case and Control samples locate to Northern Europe, with a trend and secondary cluster in Northern Italy.
