# Supplementary material for: Genome-Wide Association Study Link Novel Loci to Endometriosis
Source: PLOS journal article supplement (doi:10.1371/journal.pone.0058257), 2013-03-05
Supplement: S4 (10.1371/journal.pone.0058257.s004) [file journal.pone.0058257.s004]

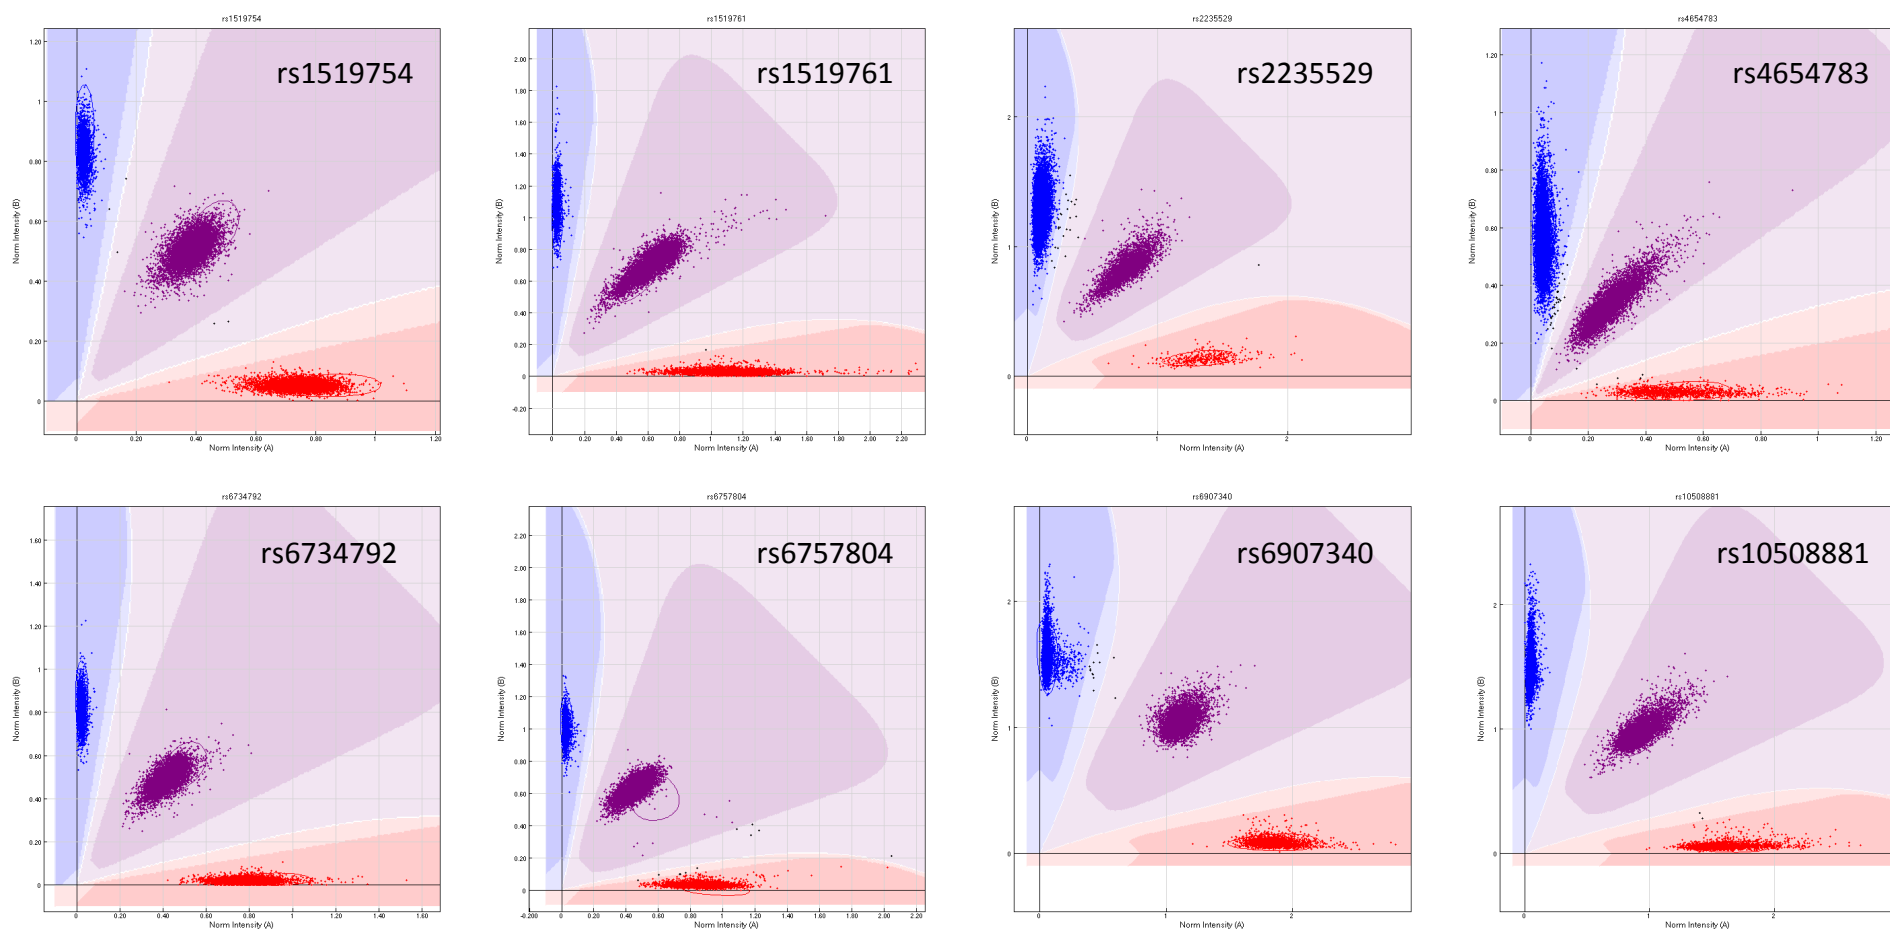

**Figure S4 Genotype clusters for the 8 most strongly associated SNPs.** The cluster plots represent the 2,019 endometriosis cases and 14,471 population controls included in the study. The clusters are clearly defined and each SNP has very high call-rate (>0.998). It is our experience with data of this quality, that technical replication doesn't affect the genotype calls significantly.
