# Supplementary material for: Genome-Wide Association Study Link Novel Loci to Endometriosis
Source: PLOS journal article supplement (doi:10.1371/journal.pone.0058257), 2013-03-05
Supplement: S9 (10.1371/journal.pone.0058257.s009) [file journal.pone.0058257.s009]

**Table S5a** Severity of endometriosis is independent of the five top loci by logistic regression analysis.

| SNPid      | CHR | BP          | Risk Allele | Category       | OR   | CI 95 %     | Beta   | SE    | P     |
|------------|-----|-------------|-------------|----------------|------|-------------|--------|-------|-------|
| rs10917151 | 1   | 22,422,721  | A           | AA or AG or GG | 1.07 | [0.91-1.25] | 0.068  | 0.080 | 0.396 |
| rs6757804  | 2   | 151,635,832 | C           | CC or CT or TT | 0.98 | [0.86-1.11] | -0.020 | 0.065 | 0.762 |
| rs6907340  | 6   | 19,803,768  | T           | TT or TC or CC | 1.08 | [0.95-1.23] | 0.078  | 0.064 | 0.220 |
| rs10975519 | 9   | 6,253,571   | T           | TT or TC or CC | 1.00 | [0.87-1.14] | -0.004 | 0.069 | 0.952 |
| rs10508881 | 10  | 44,541,565  | A           | AA or AG or GG | 1.04 | [0.92-1.18] | 0.039  | 0.064 | 0.544 |

Patients with Mild endometriosis (n=1177) were compared to patients with Moderate or Severe endometriosis (n=842) in the logistic regression analysis to determine if any of the five loci correlate with severity. The results show that severity does not depend on any of the tested loci. P-values (P) are calculated using Wald test. Beta is the regression coefficients and SE the standard error from logistic regression.

**Table S5b** Severity of endometriosis is independent of the top five loci by association analysis.

| SNPid      | CHR | BP          | MAF Controls | MAF endo All | P endo All | OR endo All [95%CI] | MAF endo Sev | P endo Sev | OR endo Sev [95% CI] |
|------------|-----|-------------|--------------|--------------|------------|---------------------|--------------|------------|----------------------|
| rs10917151 | 1   | 22,422,721  | 0.156        | 0.193        | 1.54E-09   | 1.30[1.19-1.41]     | 0.199        | 2.39E-06   | 1.34[1.19-1.52]      |
| rs6757804  | 2   | 151,635,832 | 0.401        | 0.446        | 4.05E-08   | 1.20[1.13-1.29]     | 0.445        | 4.72E-04   | 1.20[1.08-1.32]      |
| rs6907340  | 6   | 19,803,768  | 0.372        | 0.415        | 1.25E-07   | 1.20[1.12-1.28]     | 0.425        | 3.97E-06   | 1.24[1.13-1.37]      |
| rs10975519 | 9   | 6,253,571   | 0.300        | 0.338        | 1.01E-06   | 1.17[1.09-1.25]     | 0.333        | 1.72E-03   | 1.16[1.05-1.29]      |
| rs10508881 | 10  | 44,541,565  | 0.403        | 0.442        | 1.57E-06   | 1.18[1.10-1.26]     | 0.448        | 2.47E-04   | 1.21[1.09-1.33]      |

All endometriosis patients (n=2019) and patients with Moderate or Severe endometriosis (n=842) were analysed against 14,471 population controls by association analysis to determine if any of the five loci correlate with severity. The results show that the minor allele frequency in are almost identical in the two analyses suggesting minimal to no stratification. P-values (P) are calculated using Trend test in PLINK.
