# Supplementary material for: Genome-Wide Association Study Link Novel Loci to Endometriosis
Source: PLOS journal article supplement (doi:10.1371/journal.pone.0058257), 2013-03-05
Supplement: S10 (10.1371/journal.pone.0058257.s010) [file journal.pone.0058257.s010]

**Table S6** Fixation Index ( $F_{ST}$ ) divergences between estimated populations

|                   | Europe Central | Europe South-East | Europe North-East | Europe North-West | Italy | Europe South-West | Germany | African |
|-------------------|----------------|-------------------|-------------------|-------------------|-------|-------------------|---------|---------|
| Europe South East | 0.009          |                   |                   |                   |       |                   |         |         |
| Europe North East | 0.01           | 0.014             |                   |                   |       |                   |         |         |
| Europe North West | 0.004          | 0.011             | 0.01              |                   |       |                   |         |         |
| Italy             | 0.007          | 0.009             | 0.016             | 0.011             |       |                   |         |         |
| Europe south West | 0.004          | 0.01              | 0.013             | 0.006             | 0.006 |                   |         |         |
| Germany           | 0.008          | 0.014             | 0.013             | 0.007             | 0.014 | 0.011             |         |         |
| African           | 0.169          | 0.169             | 0.176             | 0.172             | 0.16  | 0.157             | 0.175   |         |
| Asian             | 0.12           | 0.119             | 0.121             | 0.12              | 0.119 | 0.118             | 0.124   | 0.208   |

$F_{ST}$  is a measure that indicate how well populations can be distinguished (Holsinger et al. 2009). A value of 0 indicate that no distinction is possible while 1 indicate complete distinction. The Table shows minimal separation within the European populations, while intercontinental populations are easily distinguished. Genetic distances were calculated based on 33,067 autosomal SNPs derived from ethnically defined samples from POPRES (Nelson et al. 2008) and internal studies (data not shown).
